# Supplementary material for: High yield selective electrochemical conversion of N2 to NH3via morphology controlled silver phosphate under ambient conditions
Source: Royal Society of Chemistry journal article supplement (doi:10.1039/d2ta04155c), 2022-01-01
Supplement: d2ta04155c1.pdf [file d2ta04155c1.pdf]

## Supporting Information

### High yield selective electrochemical conversion of N<sub>2</sub> to NH<sub>3</sub> via morphology controlled silver phosphate under ambient conditions

Divyani Gupta,<sup>a</sup> Alankar Kafle,<sup>a</sup> Sukhjot Kaur,<sup>a</sup> Prajna Parimita Mohanty,<sup>b,c</sup> Tisita Das,<sup>c</sup> Sudip Chakraborty,<sup>c</sup> Rajeev Ahuja,<sup>b,d</sup> Tharamani C. Nagaiah<sup>a\*</sup>

<sup>a</sup> Department of Chemistry, <sup>b</sup> Department of Physics, Indian Institute of Technology Ropar, Rupnagar, Punjab 140001, India.

<sup>c</sup> Materials Theory for Energy Scavenging (MATES) Lab, Harish-Chandra Research Institute (HRI) Allahabad, HBNI, Chhatnag Road, Jhansi, Prayagraj (Allahabad) 211019, India

<sup>d</sup> Condensed Matter Theory Group, Department of Physics and Astronomy, Uppsala University, Uppsala, SE-75120, Sweden

\*Corresponding author. E-mail address: tharamani@iitrpr.ac.in

#### Chemicals and reagents used

The chemicals for synthesis *i.e.* silver nitrate (AgNO<sub>3</sub>; ≥ 99.8 %,) from Chemlab, trisodium citrate (Na<sub>3</sub>C<sub>6</sub>H<sub>5</sub>O<sub>7</sub>; 99 %,) from Reachem, sodium hydroxide (NaOH; 98 %,) from Merck and sodium dihydrogen orthophosphate (NaH<sub>2</sub>PO<sub>4</sub>; 98 %,) were procured from Alfa Aesar, which are of analytical grade and used without further purification. For quantification of products formed, ammonium chloride (NH<sub>4</sub>Cl, 99 %), salicylic acid (C<sub>7</sub>H<sub>6</sub>O<sub>3</sub>, 99.5 %), sodium nitroprusside (C<sub>5</sub>FeN<sub>6</sub>Na<sub>2</sub>O, 99 %), para-dimethylaminobenzaldehyde (p-C<sub>9</sub>H<sub>11</sub>NO, 99 %), sodium nitrate (NaNO<sub>3</sub>, 99 %), sodium nitrite (NaNO<sub>2</sub>, 98 %), sulphanilamide (C<sub>6</sub>H<sub>8</sub>N<sub>2</sub>O<sub>2</sub>S, 99 %), N-(1-Naphthyl) ethylenediamine dihydrochloride (C<sub>12</sub>H<sub>14</sub>N<sub>2</sub>, 99 %), mercuric (II) iodide (HgI<sub>2</sub>), sodium potassium tartrate (C<sub>4</sub>H<sub>4</sub>O<sub>6</sub>KNa·4H<sub>2</sub>O), hydrazine monohydrate (N<sub>2</sub>H<sub>4</sub>·H<sub>2</sub>O, 99

%), sodium hypochlorite solution (NaClO, 4-6 %) and hydrogen peroxide solution (H<sub>2</sub>O<sub>2</sub>, 5 %) were purchased from Loba chemie. <sup>15</sup>NH<sub>4</sub>Cl (99%) was purchased from Cambridge isotope laboratories for isotope labeling measurements. All solutions were prepared using deionized water obtained from Millipore system (15 MΩ). All the analytical grade reagents used in this study such as potassium hydroxide (KOH, 85 %), sodium hydroxide (NaOH), hydrochloric acid (HCl; 37 %) and ethanol (C<sub>2</sub>H<sub>5</sub>OH; 99 %) were purchased from Loba chemie and Merck respectively and were used as such without further purification and. Nafion N117 membrane fitted in H-cell setup was bought from DuPont. High purity <sup>14</sup>N<sub>2</sub> (99.999%), <sup>15</sup>N<sub>2</sub> (99%) and Ar gas (99.999%) cylinders were purchased from Sigma. All the chemicals and reagents used in this study were of analytical grade and used as such without purification and the deionized water was obtained from Millipore system (>14 MΩ cm<sup>-1</sup>).

### **Material characterization**

The physical characterizations of synthesized silver phosphate composites were investigated using powder X-ray diffraction (PXRD) measurements in the 2θ range from 5 to 80 degree using PANalytical's X'Pert Pro MPD wherein the X-ray source was Cu Kα radiation. The morphology of each variants was analysed using scanning electron microscopy (FE-SEM, Hitachi, Japan, SU8010). The elemental composition was analysed using energy dispersive X-ray spectroscopic measurements (EDS, Oxford, INCAx-act, 51-ADD0013). Further, silver, phosphorus and oxygen in the matrix was confirmed by performing X-ray photoelectron spectroscopy (XPS, PHI Versa Probe II Spectrometer) working at 15 kV under an ultrahigh vacuum (UHV; 7×10<sup>-10</sup> mbar) using Al Kα monochromatic radiation ( $h\nu = 1486.6$  eV). The measurements were performed in fixed transmission mode with a pass energy of 376 eV to obtain Ag 3d, P 2p and O 1s spectra. The obtained spectra were calibrated with respect to C

1s. UV-Visible spectroscopic measurements were performed using SEC2000-DH spectrophotometer. NMR spectra were recorded using a JEOL JNM-ECS 400 Hz spectrometer at ambient probe temperatures and referenced as follows:  $^1\text{H}$ : residual internal  $\text{CHCl}_3$  7.26 ppm;  $\text{DMSO-d}_6$  2.50 ppm by applying water suppression.

### Quantification of Ammonia<sup>1</sup>

**Indophenol blue method:** After electrochemical reduction reaction, the amount of ammonia was quantified UV-Visible spectrophotometrically by Indophenol blue method. In detail, in the electrolyte taken after the reduction 2 mL of solution containing 5% salicylic acid and 5% sodium citrate in 1M KOH followed by 1 mL of 0.05 M NaClO and 0.2 mL of 1%  $\text{C}_5\text{FeN}_6\text{Na}_2\text{O}\cdot 2\text{H}_2\text{O}$  were added into the above solution was added and kept standing at room temperature for 2 h and finally the UV-Vis absorption spectrum was measured at a wavelength of 655 nm. The calibration concentration–absorbance curve was generated by using standard  $\text{NH}_4\text{Cl}$  solution with known  $\text{NH}_4^+$  concentrations of 0.1, 0.2, 0.4, 0.8, and 1.0  $\mu\text{g mL}^{-1}$  from which the concentration of ammonia was determined. The rate of ammonia formation was determined according to

$$\text{Yield rate}(\mu\text{g mg}^{-1} \text{h}^{-1}) = \frac{V \times C_{\text{NH}_3}}{t \times m_{\text{cat}}}$$

Here,  $C_{\text{NH}_3}$  is the measured  $\text{NH}_3$  concentration,  $V$  the volume of electrolyte,  $t$  the time of the reduction reaction and  $m_{\text{cat}}$  is the mass of the catalyst loaded onto GCE.

Similarly, its Faradaic efficiency (F.E.) was calculated as

$$F.E. (\%) = \frac{3 \times F \times V \times C_{\text{NH}_3}}{17 \times Q}$$

Where  $F$  is the Faraday constant and  $Q$  is the total amount of charge passed through the electrodes during the electrolysis.<sup>2</sup>

**Nessler's reagent method [1]:** For validation of  $\text{NH}_3$  quantified by Indophenol blue method, Nessler's test was also performed. At first, Nessler's reagent was prepared by adding 2.5 g of mercuric iodide into 5 mL aq. solution of potassium iodide (2 g in 5 mL deionized water) and making final solution of 20 mL by diluting with deionized water. 4 g of NaOH was then added to the above solution and labelled as Nessler's reagent. Briefly, 5 mL of electrolyte solution was collected after e-NRR to which 0.25 mL of sodium potassium tartrate ( $500 \text{ g L}^{-1}$ ) and 0.25 mL of Nessler's reagent was added. The above solution mixture was kept undisturbed for 10 minutes followed by UV-Vis. absorption measurement at  $\lambda=420 \text{ nm}$ . The calibration concentration–absorbance curve was generated by using standard  $\text{NH}_4\text{Cl}$  solution with known  $\text{NH}_4^+$  concentrations of 0.1, 0.2, 0.4, 0.8, and  $1.0 \mu\text{g mL}^{-1}$  in a similar way.

### **Quantification of hydrazine<sup>3</sup>**

**Watt-Chrisp method:** The amount of hydrazine formed during the electrolysis was determined UV-Visible spectrophotometrically by Watt and Chrisp method in which a mixture of p-C<sub>9</sub>H<sub>11</sub>NO (0.4 g), HCl (concentrated, 2 mL) and C<sub>2</sub>H<sub>5</sub>OH (20 mL) was used as colouring reagent. After electrolysis, 2 mL of electrolyte from cathodic chamber was taken out and 2 mL of colouring solution was added on it. The analyte was kept for 20 minutes and finally the absorbance of the resulting solution was measured at 455 nm. In order to determine the concentration a calibration curve was used which was generated by using standard hydrazine solution with known  $\text{N}_2\text{H}_4$  concentrations of 0.1, 0.2, 0.4, 0.8 and  $1.0 \mu\text{g mL}^{-1}$  in 0.1 M KOH.

### **Isotope labelling experiments<sup>4</sup>**

The isotope labelling experiment was performed by taking  $^{15}\text{N}_2$  (Sigma-Aldrich 99 atom%  $^{15}\text{N}$ ) as the feeding gas. The  $^{15}\text{N}_2$  gas was passed through alkaline  $\text{KMnO}_4$  followed by dilute  $\text{H}_2\text{SO}_4$  solution before purging to cell and a fixed amount of gas (25 mL gas in the interval of the 15

minutes) was supplied during the electrolysis at 0 V vs. RHE for 2 h. After electrolysis 25 ml of the electrolyte was taken out and mixed with 1M HCl and then concentrated to 1 mL.

The produced ammonia was confirmed and quantified by using  $^1\text{H}$  nuclear magnetic resonance measurements ( $^1\text{H}$  NMR) with water suppression method. A single pulse sequence was applied during the relaxation delay of 1 s with a total number of 8000 transient scans and an acquisition time of 2.18 s. Out of the concentrated electrolyte sample, 0.7 ml of the resulting liquid was taken and 0.2 ml of DMSO-  $d_6$  was added as an internal standard to achieve sufficient lock signal and 0.125 mL of maleic acid was added for quantification purpose. All other samples ( $^{14}\text{N}_2$  and Ar saturated) were tested in the similar manner. Calibration curves were extracted for different concentrations of standard  $^{14}\text{NH}_4\text{Cl}$  and  $^{15}\text{NH}_4\text{Cl}$  solutions ranging between 1 to 3 ppm with reference to maleic acid as a standard with a total number of 1024 scans.

Also, the quantification was executed by means of liquid chromatography-mass spectroscopy (LC-MS) technique by following the reported procedure.<sup>5</sup> Briefly 150  $\mu\text{L}$  of phenol solution was mixed with 30  $\mu\text{L}$  of sodium hypochlorite and sodium nitroprusside each. The above solution mixture was then added into 1.5 mL of the  $\text{NH}_4^+$  containing standard and sample solution to generate Indophenol blue. After which 15  $\mu\text{L}$  of 10 M HCl was added in order to convert the complex into Indophenol red, which was then extracted by addition of ethyl acetate (1.5 mL) from organic layer. The organic layer was separated from aqueous layer and ethyl acetate was completely evaporated, thereafter the indophenol red was re-dissolved in methanol for LC-MS.

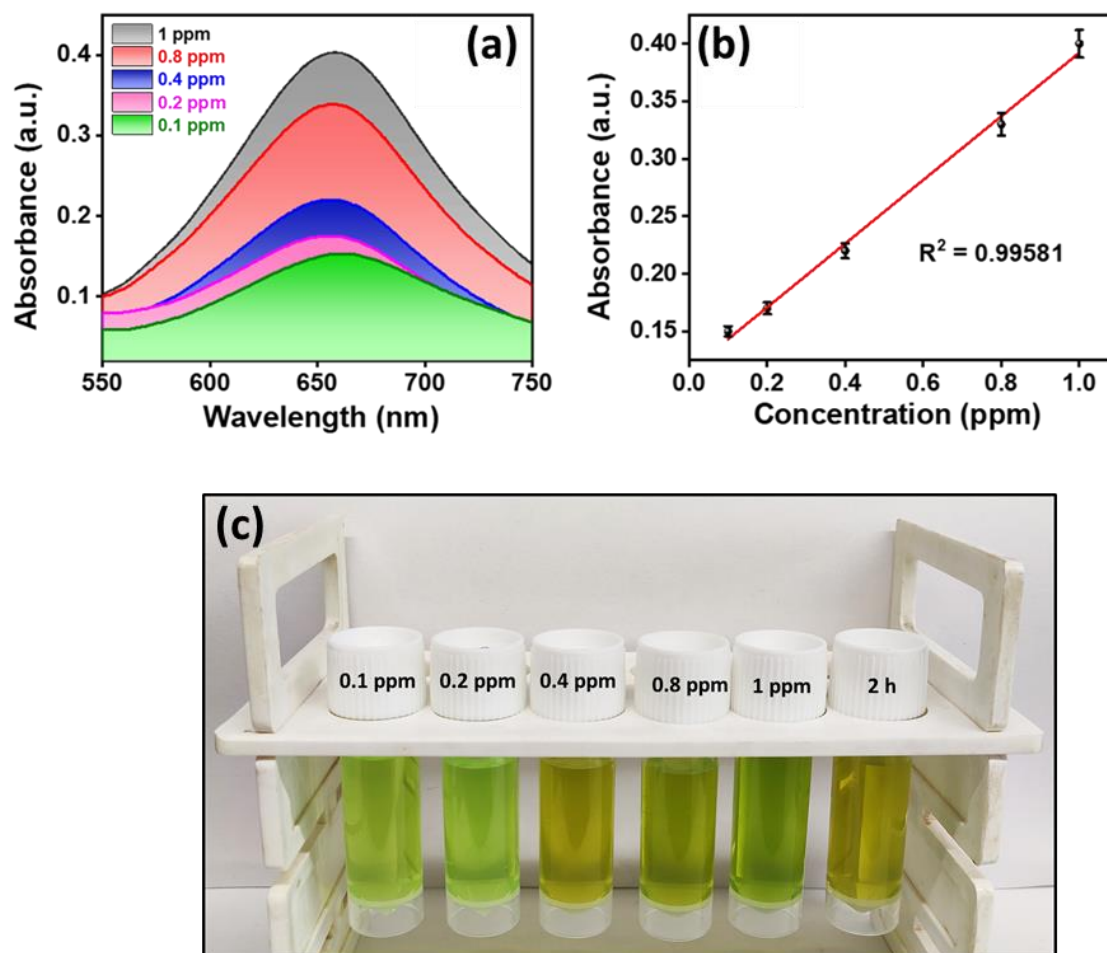

**Fig. S1** (a) UV-vis spectrum and (b) calibration curve obtained from known concentrations of standard solution of  $\text{NH}_3$  using Indophenol blue method. (c) Images of standard solutions of  $\text{NH}_4^+$  with varying concentrations and electrolyte sample collected after 2 h of electrolysis by  $\text{Ag}_3\text{PO}_4$  (2 h) at 0 V showing colour development during Indophenol blue method.

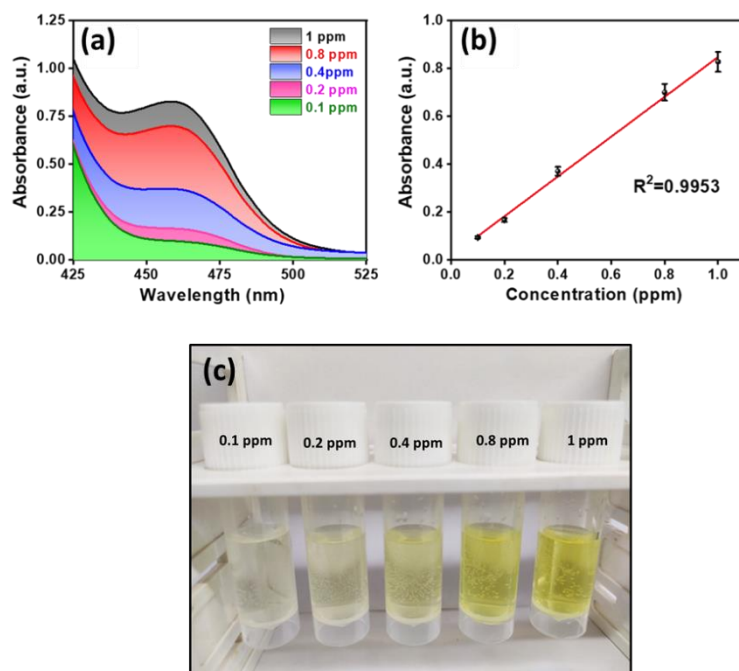

**Fig. S2** (a) UV-vis spectra of standard  $N_2H_4$  solutions by Watt and Crisp method (b) corresponding calibration curve. (c) Images of standard  $N_2H_4$  solutions showing colour development during Watt-Chrisp quantification method.

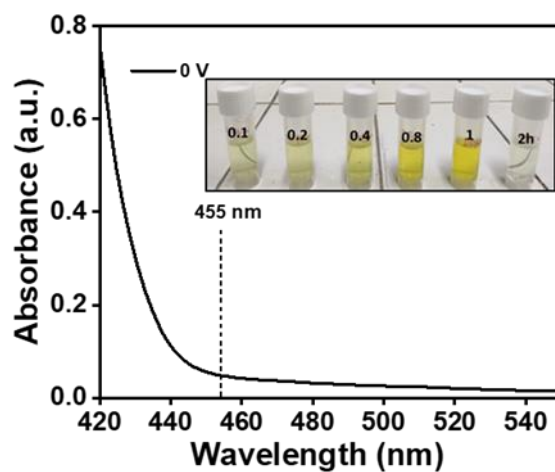

**Fig. S3** UV-vis spectrum of electrolyte sample collected [ $Ag_3PO_4$  (2 h)] after 2 h chronoamperometry at 0 V vs. RHE for hydrazine determination.

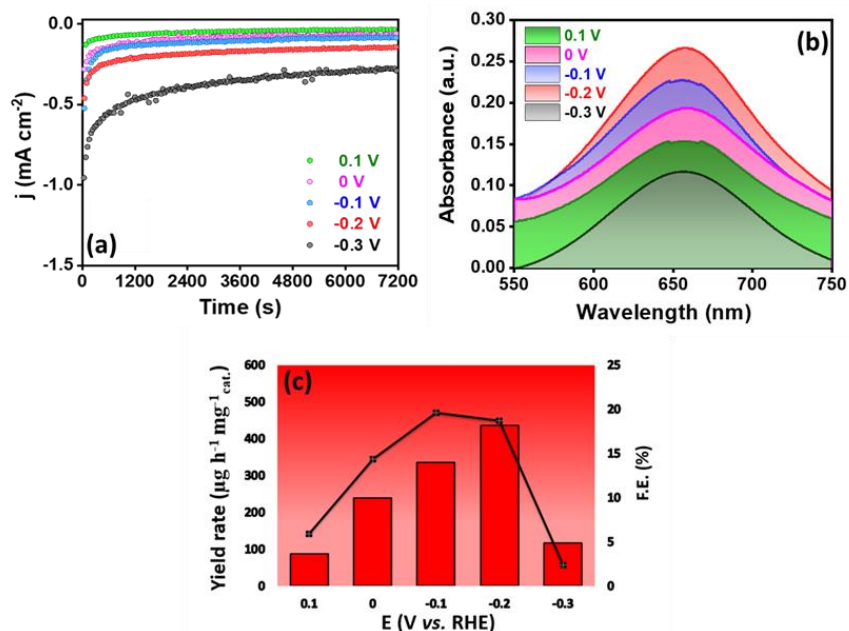

**Fig. S4A** (a) Chronoamperometric curves obtained at different potentials in N<sub>2</sub> saturated 0.1 M KOH, (b) respective UV-Vis. absorption curves after quantification by Indophenol blue method and (c) Bar graph representing F.E. and NH<sub>3</sub> production yield rate for Ag<sub>3</sub>PO<sub>4</sub> (4 h).

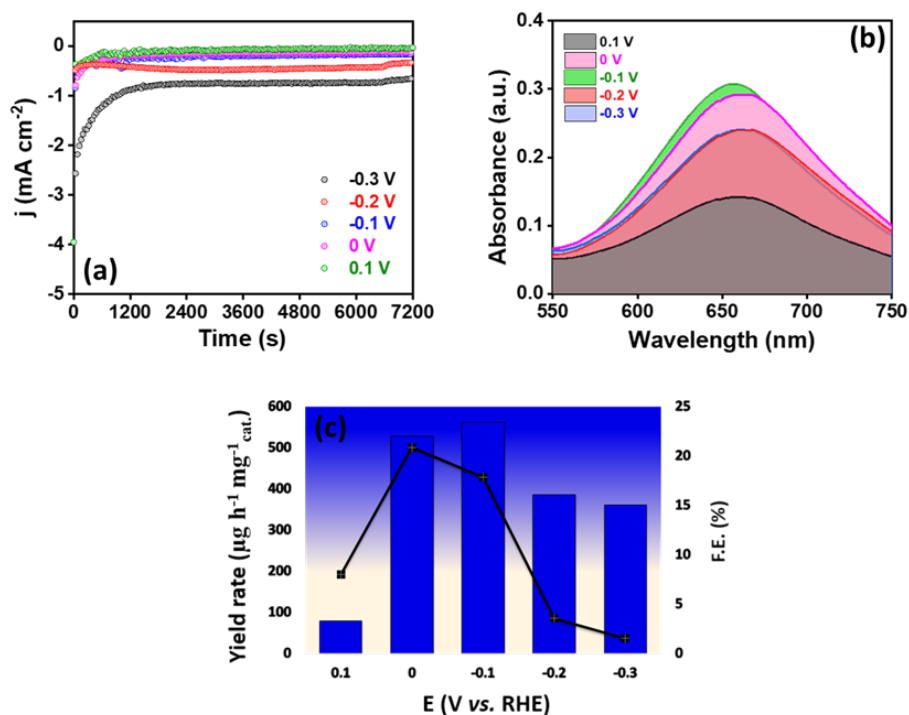

**Fig. S4B** (a) Chronoamperometric curves obtained after 2 h of electrolysis under N<sub>2</sub> saturated electrolyte, (b) corresponding UV-Vis. absorption curves obtained after quantification and (c) Bar diagram screening F.E. and NH<sub>3</sub> production yield rate for Ag<sub>3</sub>PO<sub>4</sub> (6 h).



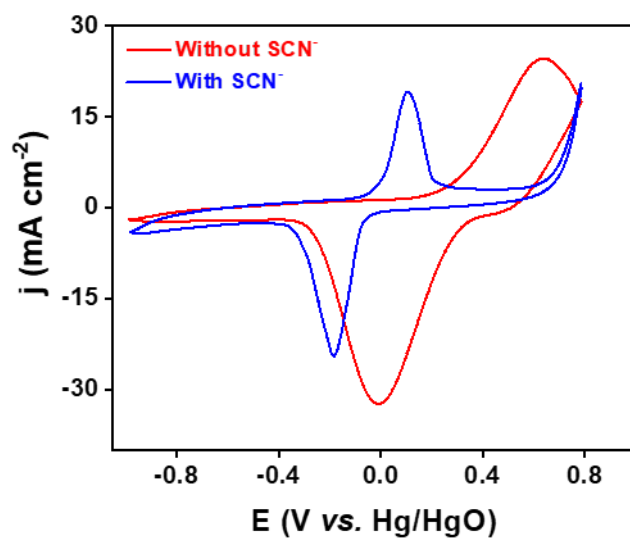

**Figure S5A.** Cyclic voltammograms acquired for Ag<sub>3</sub>PO<sub>4</sub> (2 h) catalyst coated GCE in presence and absence of SCN<sup>-</sup> ions.

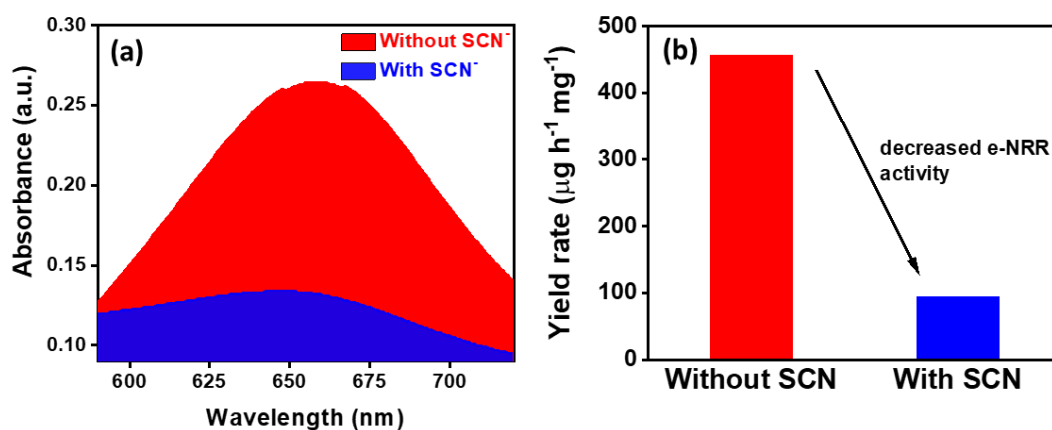

**Figure S5B.** (a) UV-Vis. absorbance curves obtained by quantification of samples collected after e-NRR by Ag<sub>3</sub>PO<sub>4</sub> (2 h) in absence and presence of SCN<sup>-</sup>, and (b) Bar diagram comparison of NH<sub>3</sub> yield rate calculated after NRR control experiments in presence and absence of SCN<sup>-</sup> ions by Ag<sub>3</sub>PO<sub>4</sub> catalyst.

**TOF calculations for Ag<sub>3</sub>PO<sub>4</sub> (2 h) catalyst during e-NRR:**

$$\text{Turnover frequency (TOF)} = \frac{\text{Turnover number (TON)}}{\text{Time (h)}}$$

$$\text{Turnover number (TON)} = \frac{\text{NH}_3\text{yield (mg)}}{\text{Catalyst loading (mg)}}$$

Where, Time is for the total hours of electrolysis during e-NRR, NH<sub>3</sub> yield is obtained from the quantification of product after e-NRR

Therefore the TON and TOF for Ag<sub>3</sub>PO<sub>4</sub> (2h) catalyst after 2 h of e-NRR is calculated as follows:

$$\text{TON} = \frac{0.02725}{0.02983} = 0.91$$

$$\text{TOF} = \frac{0.91}{2} = 0.46 \text{ h}^{-1}$$

| Catalyst                                      | Electrolyte                           | R <sub>NH<sub>3</sub></sub> ( μg h <sup>-1</sup> mg <sup>-1</sup> ) | Pot. vs. RHE | F.E. (%)               | Ref. |
|-----------------------------------------------|---------------------------------------|---------------------------------------------------------------------|--------------|------------------------|------|
| Ag nanosheets                                 | 0.1 M HCl                             | 4.62 × 10 <sup>-11</sup> mol cm <sup>-2</sup> s <sup>-1</sup>       | -0.6 V       | 4.8                    | 6    |
| Bi NPs                                        | 0.1 M Na <sub>2</sub> SO <sub>4</sub> | 3.25 ± 0.08 μg cm <sup>-2</sup> h <sup>-1</sup> (-0.7 V)            | -            | 12.11 ± 0.84% (-0.6 V) | 7    |
| B–Ag NSs                                      | 0.1 M HCl                             | 26.48                                                               | -0.5 V       | 8.86                   | 8    |
| Fe doped-W <sub>18</sub> O <sub>49</sub> @CFP | 0.25 M LiClO <sub>4</sub>             | 24.7                                                                | -0.15 V      | 20.0 %                 | 9    |
| VN@NSC-900                                    | 0.1 M HCl                             | 20.5                                                                | -0.3 V       | 8.6%                   | 10   |
| Pd-Ag-S PNSs                                  | 0.1 M Na <sub>2</sub> SO <sub>4</sub> | 9.73                                                                | -0.2 V       | 18.41                  | 11   |

|                                             |                                                 |                                                               |                    |                |                  |
|---------------------------------------------|-------------------------------------------------|---------------------------------------------------------------|--------------------|----------------|------------------|
| Ce <sub>1/3</sub> NbO <sub>3</sub>          | 0.1 M Na <sub>2</sub> SO <sub>4</sub>           | 10.34 μg h <sup>-1</sup> cm <sup>-2</sup>                     | -0.8 V             | 6.87%          | 12               |
| Ag NPs-rGO                                  | 0.1 M Na <sub>2</sub> SO <sub>4</sub>           | 18.86                                                         | -0.7 V             | 3.36           | 13               |
| Ag NPs                                      | 0.1 M Na <sub>2</sub> SO <sub>4</sub>           | 9.23                                                          | -0.7 V             | 2.25           | 13               |
| FL-VS <sub>2</sub>                          | 0.1 M HCl                                       | 34.62                                                         | -0.7 V             | 2.09% (-0.6 V) | 14               |
| BD/Ag-AF                                    | 0.1 M Na <sub>2</sub> SO <sub>4</sub>           | 2.07 × 10 <sup>-11</sup> mol cm <sup>-2</sup> s <sup>-1</sup> | -0.6 V             | 7.36           | 15               |
| SnNb <sub>2</sub> O <sub>6</sub> nanosheets | 0.5 M LiClO <sub>4</sub>                        | 53.1                                                          | -0.3 V             | 17.6%          | 16               |
| Ag-Au@ZIF                                   | 0.2 M LiCF <sub>3</sub> SO <sub>3</sub>         | 1.0 9 10 <sup>-11</sup> mol s <sup>-1</sup> cm <sup>-2</sup>  | -2.5 V vs. Ag/AgCl | 18 ± 4         | 17               |
| Ag triangular nanoplates                    | 0.5 M K <sub>2</sub> SO <sub>4</sub>            | 58.5 mg h <sup>-1</sup> g <sup>-1</sup>                       | -0.25 V            | 25             | 18               |
| MnMoO <sub>4</sub> nanorods/rGO             | LiClO <sub>4</sub>                              | 60.3                                                          | -0.3 V             | 14.7%          | 19               |
| Single Ag                                   | 0.1 M HCl                                       | 270.9                                                         | -0.6 V             | 21.9           | 20               |
| AgNDs                                       | 0.1 M Na <sub>2</sub> SO <sub>4</sub> (pH=10.5) | 600.4 ± 23.0                                                  | -0.25 V            | 10.1 ± 0.7%    | 21               |
| Mo-Co/NC                                    | 0.1 M Na <sub>2</sub> SO <sub>4</sub>           | 89.8 μmol h <sup>-1</sup> g <sub>cat.</sub> <sup>-1</sup>     | -0.1 V             | 13.5%          | 22               |
| Ag <sub>3</sub> Cu BPNs                     | 0.1 M Na <sub>2</sub> SO <sub>4</sub>           | 24.59                                                         | -0.5 V             | 13.28          | 23               |
| Mo-MnO <sub>2</sub> NFs                     | 0.1 M Na <sub>2</sub> SO <sub>4</sub>           | 36.6 (-0.5 V)                                                 | -                  | 12.1% (-0.4 V) | 24               |
| Cu-TiO <sub>2</sub> /CP                     | 0.5 M LiClO <sub>4</sub>                        | 21.31                                                         | -0.55 V            | 21.99%         | 25               |
| FeVO <sub>4</sub>                           | 0.5 M LiClO <sub>4</sub>                        | 52.8 (-0.4 V)                                                 | -                  | 15.7% (-0.3 V) | 26               |
| La <sub>x</sub> FeO <sub>3-δ</sub>          | 0.1 M Li <sub>2</sub> SO <sub>4</sub>           | 22.1 (-0.5 V)                                                 | -                  | 25.6% (-0.3 V) | 27               |
| CoP <sub>3</sub> /CC                        | 0.1 M Na <sub>2</sub> SO <sub>4</sub>           | 3.61 × 10 <sup>-11</sup> mol s <sup>-1</sup> cm <sup>-2</sup> | -0.2 V             | 11.94%         | 28               |
| Au(111)@Bi <sub>2</sub> S <sub>3</sub>      | Na <sub>2</sub> SO <sub>4</sub>                 | 45.57                                                         | -0.8 V             | 3.10%          | 29               |
| SnS@C                                       | 0.1 M Na <sub>2</sub> SO <sub>4</sub>           | 24.33                                                         | -0.5 V             | 14.56%         | 30               |
| <b>Ag<sub>3</sub>PO<sub>4</sub> (2 h)</b>   | <b>0.1 M KOH</b>                                | <b>456.75</b>                                                 | <b>0 V</b>         | <b>26.66</b>   | <b>This work</b> |

|                                       |           |        |        |       |           |
|---------------------------------------|-----------|--------|--------|-------|-----------|
| Ag <sub>3</sub> PO <sub>4</sub> (4 h) | 0.1 M KOH | 335.23 | -0.1 V | 19.57 | This work |
| Ag <sub>3</sub> PO <sub>4</sub> (6 h) | 0.1 M KOH | 527.99 | 0 V    | 20.87 | This work |

**Table S1b. Comparison of activity of recent reported catalysts towards NRR in alkaline media**

| Catalyst                                 | Electrolyte | R <sub>NH<sub>3</sub></sub> ( $\mu\text{g h}^{-1} \text{mg}_{\text{cat.}}^{-1}$ ) | Pot. vs. RHE | F.E. (%)  | Ref. |
|------------------------------------------|-------------|-----------------------------------------------------------------------------------|--------------|-----------|------|
| MIL-100 (Al)/Cu                          | 0.1 M KOH   | 10.6 $\mu\text{g h}^{-1} \text{cm}^{-2} \text{mg}_{\text{cat.}}^{-1}$             | 0 V          | 22.6      | 31   |
| Ag <sub>2</sub> Au <sub>1</sub>          | 0.1 M KOH   | 21.7                                                                              | -0.3 V       | 3.8       | 32   |
| Co <sub>3</sub> Fe-MOF                   | 0.1 M KOH   | 8.79                                                                              | -0.2 V       | 25.64     | 33   |
| 3D Rh particles                          | 0.1 M KOH   | 35.58                                                                             | -0.2 V       | 1.2 (0 V) | 34   |
| Fe-N/C-carbon nanotube (CNT)             | 0.1 M KOH   | 34.83                                                                             | -0.2 V       | 9.28      | 35   |
| Cu SAC                                   | 0.1 M KOH   | 53.3                                                                              | -0.35 V      | 13.8      | 36   |
| Cu/PI-300                                | 0.1 M KOH   | 12.4 $\mu\text{g h}^{-1} \text{cm}^{-2}$                                          | -0.3 V       | 6.56      | 37   |
| FeSA-N-C                                 | 0.1 M KOH   | 7.48 $\mu\text{g h}^{-1} \text{cm}^{-2}$                                          | 0 V          | 56.55     | 38   |
| C-ZIF-1100-1 h                           | 0.1 M KOH   | 9.22 $\text{mmol g}^{-1} \text{h}^{-1}$                                           | -0.3 V       | 10.2      | 39   |
| SA-Mo/NPC                                | 0.1 M KOH   | 34.0 $\text{g h}^{-1} \text{mg}_{\text{cat.}}^{-1}$                               | -0.45 V      | 14.6      | 40   |
| PdRu TPs                                 | 0.1 M KOH   | 37.23                                                                             | -0.2 V       | 1.85      | 41   |
| Pd <sub>3</sub> Cu <sub>1</sub>          | 0.1 M KOH   | 39.9                                                                              | -0.25 V      | 0.58      | 42   |
| Rh NNs                                   | 0.1 M KOH   | 23.9                                                                              | -0.2 V       | 0.217     | 43   |
| Pd <sub>0.2</sub> Cu <sub>0.8</sub> /rGO | 0.1 M KOH   | 2.80                                                                              | -0.2 V       | -         | 44   |
| Se-doped C                               | 0.1 M KOH   | 1.14 $\mu\text{g h}^{-1} \text{cm}^{-2}$                                          | -0.45V       | 3.92      | 45   |

|                                             |                  |                                               |            |              |                      |
|---------------------------------------------|------------------|-----------------------------------------------|------------|--------------|----------------------|
| Te-doped C                                  | 0.1 M KOH        | 1.91 $\mu\text{g h}^{-1} \text{cm}^{-2}$      | -0.5 V     | 4.6          | 45                   |
| FeWS <sub>x</sub> @FeW<br>O <sub>4</sub> -2 | 1 M KOH          | 16.6                                          | -0.45 V    | 6.01         | 46                   |
| Eex-COF/NC                                  | 0.1 M KOH        | 12.5                                          | -0.2V      | 45.4         | 47                   |
| Ru@Ti3C2Tx                                  | 0.1 M KOH        | 2.3<br>$\mu\text{mol h}^{-1} \text{cm}^{-2}$  | -0.4 V     | 13.13        | 48                   |
| Cu@Ti3C2Tx                                  | 0.1 M KOH        | 3.04<br>$\mu\text{mol h}^{-1} \text{cm}^{-2}$ | -0.5 V     | 7.31         | 49                   |
| Au/CeOx-<br>RGO                             | 0.1 M KOH        | 8.31                                          | -0.2 V     | 10.1         | 50                   |
| CuAg@Ti3C2<br>Tx                            | 0.1 M KOH        | 4.12<br>$\mu\text{mol cm}^{-2} \text{h}^{-1}$ | -0.5 V     | 9.77         | 51                   |
| Tetrahexahe<br>dral Au<br>nanorods          | 0.1 M KOH        | 6.042                                         | -0.2 V     | 3.88         | 52                   |
| CoP hollow<br>nanocage                      | 1 M KOH          | 10.78                                         | -0.4 V     | 7.36         | 53                   |
| Fe3Mo3C                                     | 1 M KOH          | 13.1 $\mu\text{g cm}^{-2} \text{h}^{-1}$      | -0.5 V     | 0.26         | 2                    |
| FL-Sb<br>nanosheets                         | 0.1 M KOH        | 133.1                                         | 0.05 V     | 11.6         | 54                   |
| 2D Layered<br>W2N3                          | 0.1 M KOH        | 11.66                                         | -0.2 V     | 11.67        | 55                   |
| CoPi/NPCS                                   | 0.1 M KOH        | 20.5                                          | -0.2 V     | 7.07         | 56                   |
| K2Ti4O9<br>nanobelt                         | 0.1 M KOH        | 22.8                                          | -0.5 V     | 5.9          | 57                   |
| Zr-doped<br>TiO2                            | 0.1 M KOH        | 8.9 $\mu\text{g h}^{-1} \text{cm}^{-2}$       | -0.45 V    | 17.3         | 58                   |
| CoPi/HSNPC                                  | 0.1M KOH         | 16.48                                         | -0.2 V     | 4.46         | 59                   |
| Cu <sub>1.81</sub> S                        | 0.1 M KOH        | 2.19 $\mu\text{mol h}^{-1} \text{cm}^{-2}$    | -0.1 V     | 14.1         | 60                   |
| Co/C-900                                    | 0.1 M KOH        | 4.66 $\mu\text{mol h}^{-1} \text{cm}^{-2}$    | -0.3 V     | 11.53        | 61                   |
| <b>Ag<sub>3</sub>PO<sub>4</sub> (2 h)</b>   | <b>0.1 M KOH</b> | <b>456.75</b>                                 | <b>0 V</b> | <b>26.66</b> | <b>This<br/>work</b> |

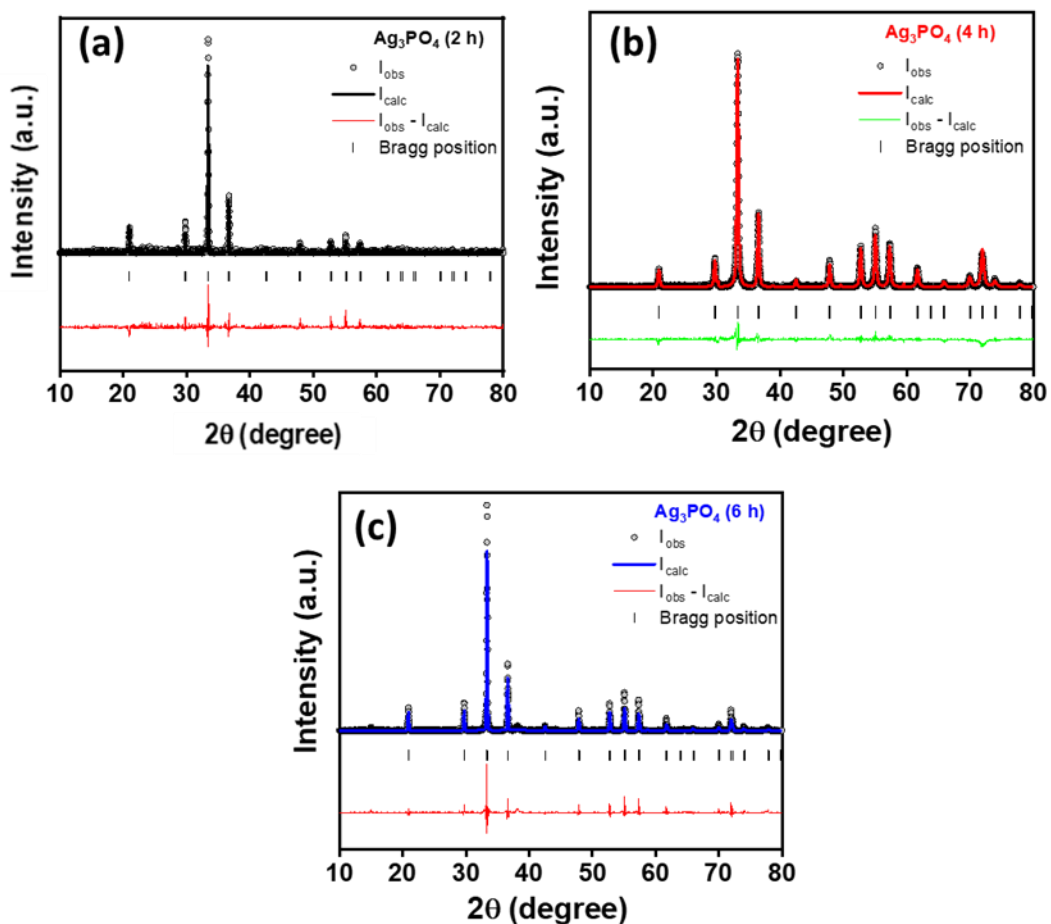

**Fig. S6** Powder-XRD patterns for (a)  $\text{Ag}_3\text{PO}_4$  (2 h); Goodness of fit: 4.986, (c)  $\text{Ag}_3\text{PO}_4$  (4 h); Goodness of fit: 3.2 and (d)  $\text{Ag}_3\text{PO}_4$  (6 h) electrocatalysts Goodness of fit: 8.929.

| Table S2. EDS composition analysis |         |         |                                |         |                                |         |
|------------------------------------|---------|---------|--------------------------------|---------|--------------------------------|---------|
| $\text{Ag}_3\text{PO}_4$ (2 h)     |         |         | $\text{Ag}_3\text{PO}_4$ (4 h) |         | $\text{Ag}_3\text{PO}_4$ (6 h) |         |
| Element                            | Weight% | Atomic% | Weight%                        | Atomic% | Weight%                        | Atomic% |
| O K                                | 23.31   | 62.14   | 26.55                          | 66.08   | 28.47                          | 70.83   |
| P K                                | 7.69    | 10.58   | 7.43                           | 9.55    | 3.03                           | 3.90    |
| Ag L                               | 69.00   | 27.28   | 66.01                          | 24.37   | 68.50                          | 25.27   |

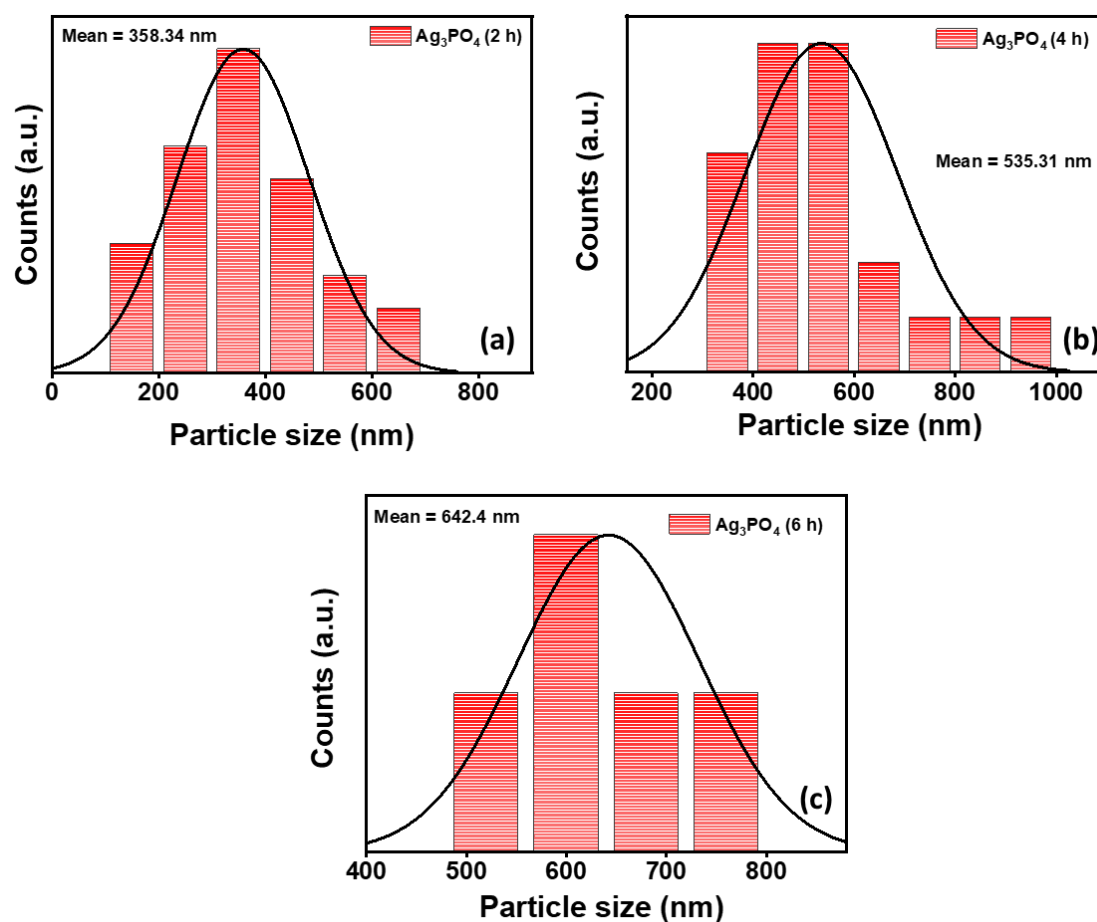

**Fig. S7A** Particle size distribution histogram of (a)  $\text{Ag}_3\text{PO}_4$  (2 h), (b)  $\text{Ag}_3\text{PO}_4$  (4 h) and (c)  $\text{Ag}_3\text{PO}_4$  (6 h) catalyst from corresponding FE-SEM images.

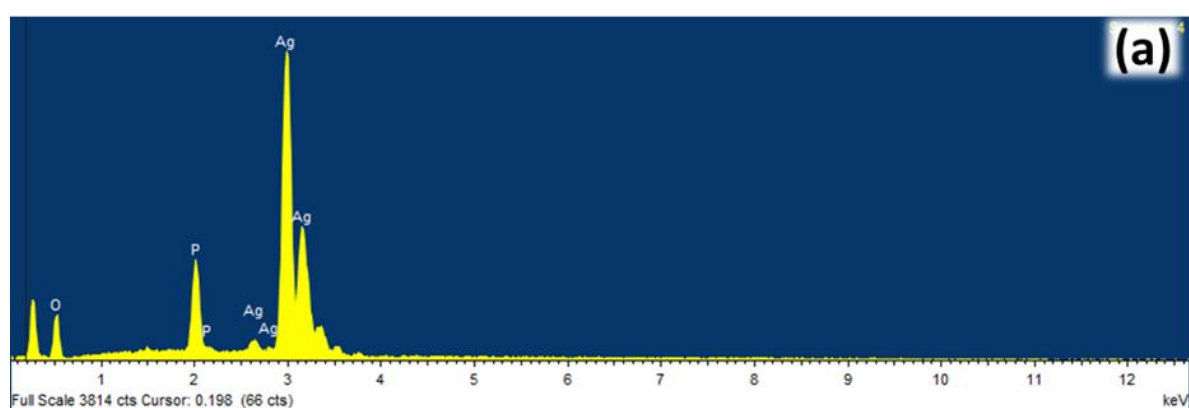

**Fig. S7B** EDS spectrum of (a)  $\text{Ag}_3\text{PO}_4$  (2 h) catalyst.

| Table S3. Electrochemical Impedance analysis extracted from Fig. 3a. |                                       |                    |                    |                       |
|----------------------------------------------------------------------|---------------------------------------|--------------------|--------------------|-----------------------|
| S. No.                                                               | Electrocatalyst                       | $R_s$ ( $\Omega$ ) | $R_p$ ( $\Omega$ ) | $R_{ct}$ ( $\Omega$ ) |
| 1                                                                    | Ag <sub>3</sub> PO <sub>4</sub> (2 h) | 0.95               | 70.98              | 70.03                 |
| 2                                                                    | Ag <sub>3</sub> PO <sub>4</sub> (4 h) | 0.12               | 108.64             | 108.52                |
| 3                                                                    | Ag <sub>3</sub> PO <sub>4</sub> (6 h) | 0.12               | 80.11              | 79.99                 |

### Electrochemical impedance measurements

The electrochemical impedance behavior was studied for the composites in N<sub>2</sub>-saturated 0.1M KOH electrolyte by applying 0.880 V vs. Ag/AgCl of DC potential over an AC perturbation of 10 mV with logarithmic frequency step over a single sine wave for the various frequency ranging from 20 Hz to 600 kHz in the logarithmic steps. The solution resistance ( $R_s$ ) was obtained from the point of intersection of the semicircle at the high frequency real axis whereas the polarization resistance ( $R_p$ ) at the low frequency near the electrode-electrolyte interface. The charge transfer resistance ( $R_{ct}$ ) was calculated by subtracting the  $R_s$  from  $R_p$ .

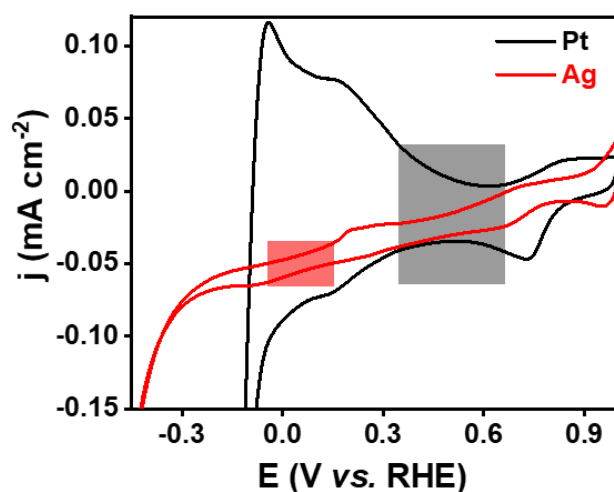

**Fig. S8** Cyclic voltammograms for Pt and Ag separately for non-faradaic region determination.



### Double-layer pseudo-capacitance ( $C_{dl}$ ):

To determine the double-layer pseudo-capacitance ( $C_{dl}$ ) of the composites, the cyclic voltammetry was performed in the non-faradic potential region 0.88 V and 0.98 V vs. RHE with different scan rate (10 to 320  $\text{mV s}^{-1}$ ). The double layer pseudo capacitance was obtained as the slope of the graph of both anodic and cathodic averaged out current density versus the scan rate.

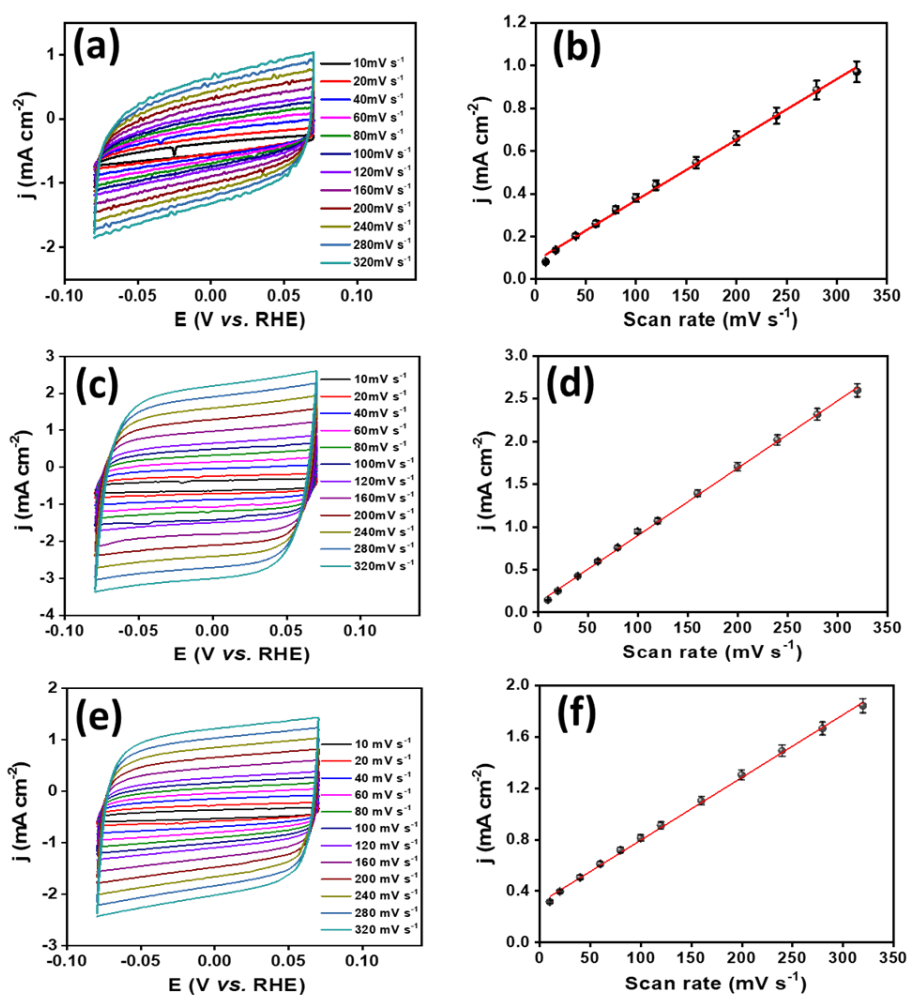

**Fig. S9.** Cyclic voltammogram (a)  $\text{Ag}_3\text{PO}_4$  (2 h), (b)  $\text{Ag}_3\text{PO}_4$  (4 h), (c)  $\text{Ag}_3\text{PO}_4$  (6 h) in non-faradic potential region ( $H_{\text{UPD}}$  region for Ag determined from Fig. S8) at various scan rates where (d), (e) & (f) are corresponding average current density versus scan rate plot for ECSA determination in 0.1 M KOH. CE: Pt wire; RE: Hg/HgO/1 M NaOH.

| Table S4. Electrochemical surface area (ECSA) determination from Fig. S9. |                                       |                     |                         |
|---------------------------------------------------------------------------|---------------------------------------|---------------------|-------------------------|
| S.No.                                                                     | Electrocatalyst                       | $C_{dl}^*$ (mF)     | ECSA (cm <sup>2</sup> ) |
| 1                                                                         | Ag <sub>3</sub> PO <sub>4</sub> (2 h) | 2.83 at 0 V vs. RHE | 70.75                   |
| 2                                                                         | Ag <sub>3</sub> PO <sub>4</sub> (4 h) | 7.88 at 0 V vs. RHE | 197                     |
| 3                                                                         | Ag <sub>3</sub> PO <sub>4</sub> (6 h) | 4.87 at 0 V vs. RHE | 121.75                  |

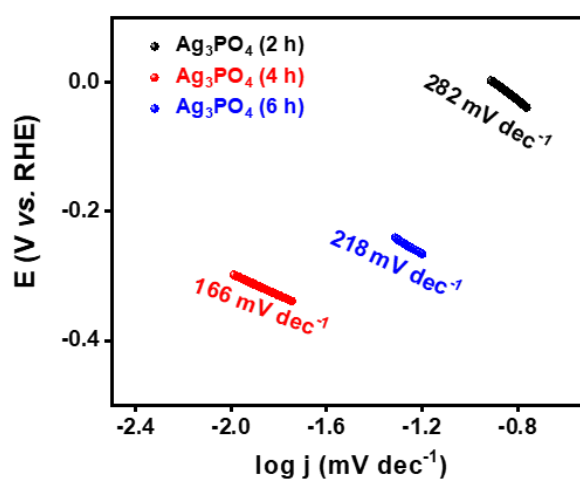

Fig. S10 Tafel plots for Ag<sub>3</sub>PO<sub>4</sub> catalysts under Ar-saturated electrolyte environment for HER.

| Table S5. Tafel slope values extracted from LSV of catalysts |                                       |                                             |                                               |
|--------------------------------------------------------------|---------------------------------------|---------------------------------------------|-----------------------------------------------|
| S.No.                                                        | Electrocatalyst                       | Tafel slope (mV dec <sup>-1</sup> ) for HER | Tafel slope (mV dec <sup>-1</sup> ) for e-NRR |
| 1                                                            | Ag <sub>3</sub> PO <sub>4</sub> (2 h) | 282                                         | 229                                           |
| 2                                                            | Ag <sub>3</sub> PO <sub>4</sub> (4 h) | 166                                         | 394                                           |
| 3                                                            | Ag <sub>3</sub> PO <sub>4</sub> (6 h) | 218                                         | 297                                           |

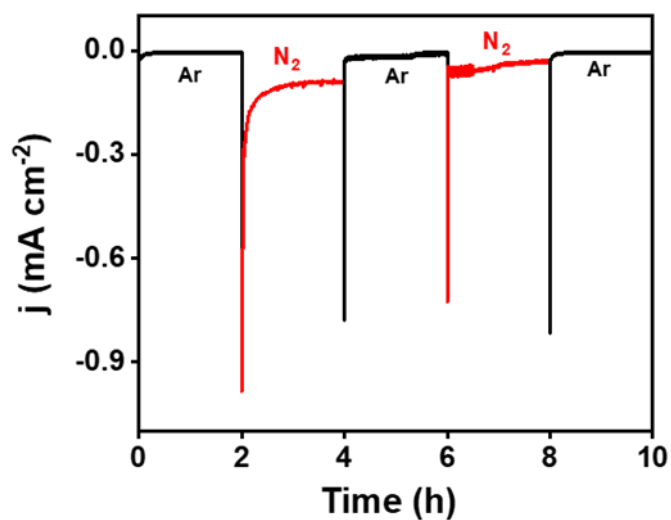

**Fig. S11** Chronoamperometry measurements in Ar and N<sub>2</sub> saturated 0.1 M KOH.

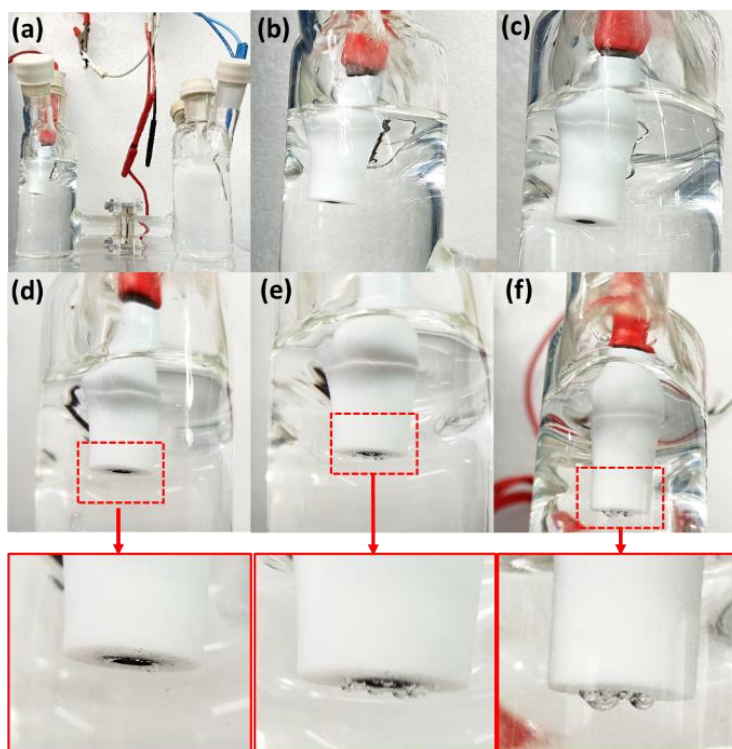

**Fig. S12** (a) Photographs of Ag<sub>3</sub>PO<sub>4</sub> (2 h) captured during GC analysis for HER quantification at different potentials (b) 0 V, (c) -0.1 V, (d) -0.2 V, (e) -0.3 V, (f) -0.4 V respectively.

### Determination of HER productions:

Evolution of H<sub>2</sub> during NRR at applied potentials were detected quantitatively by means of a gas chromatograph (GC, SHIMADZU, GC-2030) During NRR, high purity N<sub>2</sub> (99.999%) was continuously purged in the cathodic chamber of H-cell. A SHIMADZU Rt-Q-BOND column was installed in GC having two detectors, namely, a thermal conductivity detector (TCD) and a flame ionization detector (FID) to measure H<sub>2</sub>. The carrier gas used was N<sub>2</sub>. Below mentioned are the formulas used for quantification of produced hydrogen.

$$\text{Yield rate (mmol mg}^{-1} \text{ h}^{-1}) = \frac{\text{yield (mmol)}}{t \text{ (h)} \times m_{\text{cat.}} \text{ (mg)}}$$

$$\text{Selectivity (\%)} = \frac{\text{Experimental}_{\text{H}_2} \times 100}{\text{Theoretical}_{\text{H}_2}}$$

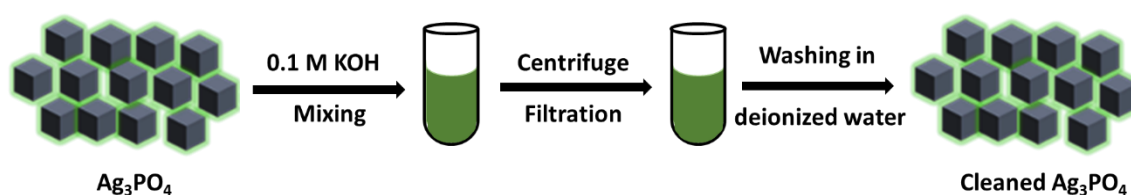

**Scheme S1.** Schematic representation of catalyst treatment for NO<sub>3</sub><sup>-</sup> removal.

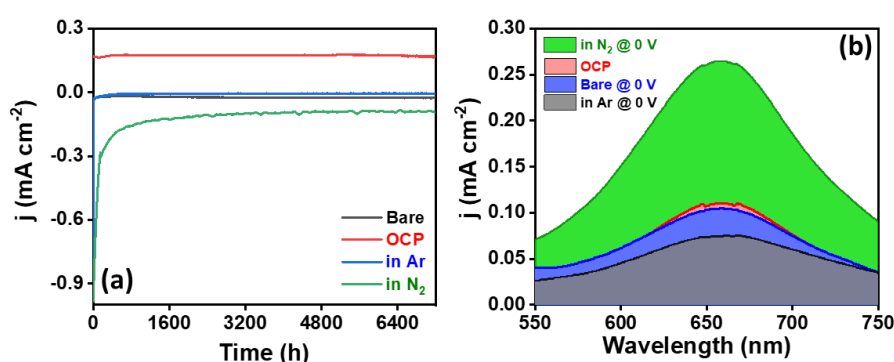

**Fig. S13** (a) Chronoamperometric curves and (b) UV-vis spectrum of Ag<sub>3</sub>PO<sub>4</sub> (2 h) at OCP in N<sub>2</sub> saturated 0.1 M KOH, at 0.0 V vs. RHE in N<sub>2</sub>/Ar saturated electrolyte, and that of bare GC at 0.0 V vs. RHE in N<sub>2</sub> saturated 0.1 M KOH respectively.

### **Nitrate ( $\text{NO}_3^-$ ) and nitrite ( $\text{NO}_2^-$ ) determination<sup>62</sup>:**

For determination of any trace amount of  $\text{NO}_3^-$  present in the electrolyte (i.e. 0.1 M KOH), UV-Vis. spectrophotometry was utilised wherein the peak at wavelength of 220 nm correspond to absorption of nitrates. Furthermore, the nitrate amount was quantified with respect to measured absorbance value. Standard solutions were prepared using  $\text{NaNO}_3$  stock solution with varying concentrations i.e. 0.2 ppm to 5 ppm. Subsequently, 5 mL of standard along with sample solution were taken in glass vial to which 0.1 mL of 1 M HCl was added later on with recurrent shaking. The solution kept undisturbed for 5 min. and UV-vis. measurement was performed in the range of 200-300 nm from which the calibration curve was acquired. Additionally, quantification of nitrites can be performed via diazotization reaction by using sulphanilamide under acidic environment followed by coupling with N-(1-Naphthyl) ethylenediamine dihydrochloride which result into formation of pink colored azo dyes with corresponding peak at 540 nm respectively. Initially, standard solutions were prepared using  $\text{NaNO}_2$  stock solution with different concentrations i.e. 2 to 60  $\mu\text{g L}^{-1}$ . Afterwards, two reagents were prepared separately; 0.5 g of sulphanilamide in 50 mL of 2 M HCl i.e. **A** and 20 mg of N-(1-Naphthyl) ethylenediamine dihydrochloride in 20 mL of deionized  $\text{H}_2\text{O}$  i.e. **B**. Briefly, 5 mL of standard or sample solution were taken in glass vials followed by addition of 0.1 mL of A which was then allowed to stand for 10 min. Afterwards, 0.1 mL of B was added to above solution respectively. The solution mixture was kept undisturbed for 30 min and

amount of  $\text{NO}_2^-$  was estimated under wavelength range of 440-600 nm, from which calibration curves were extracted.

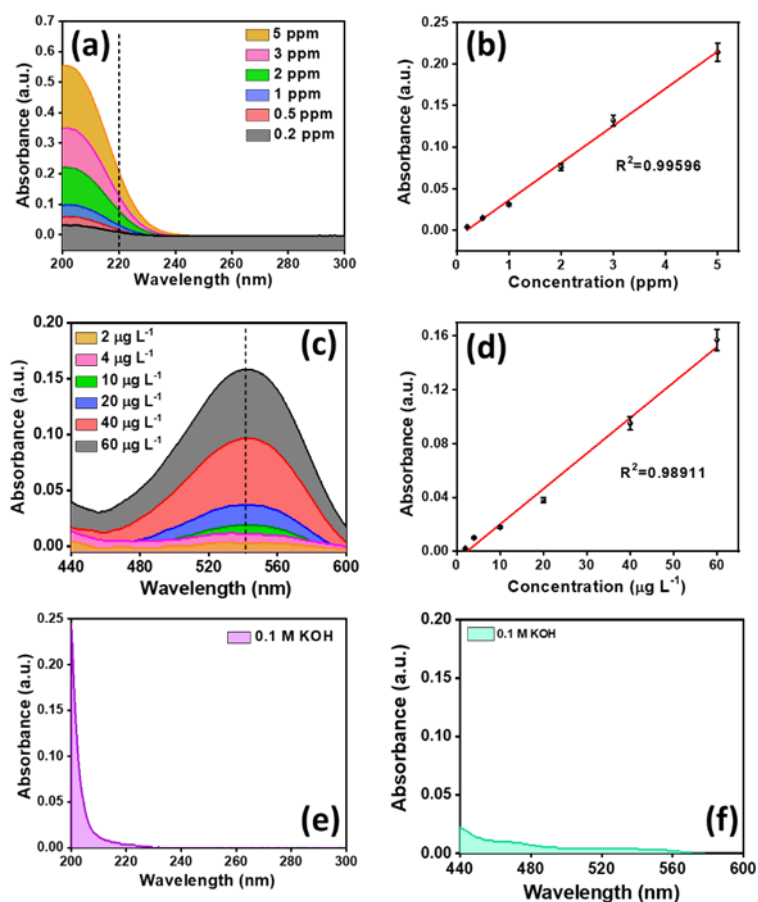

**Fig. S14** UV-vis spectrum and corresponding calibration curve for **(a-b)** nitrate and **(c-d)** nitrite detection. Detection of amount of **(e)**  $\text{NO}_3^-$  and **(f)**  $\text{NO}_2^-$  in electrolyte solution.

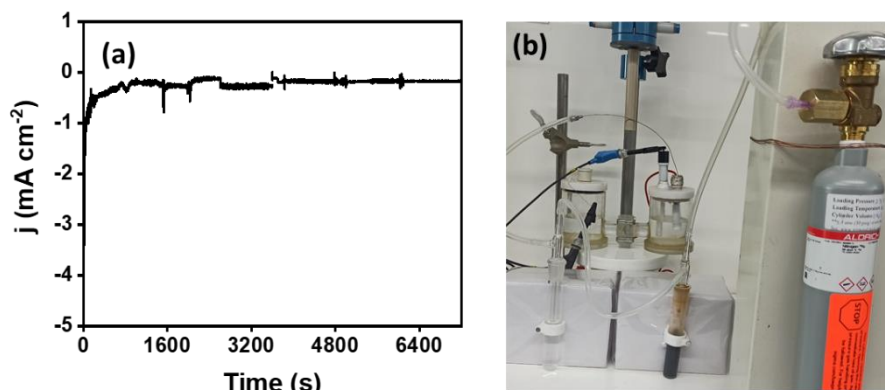

**Fig. S15** (a) Chronoamperometry measurements at 0 V (vs. RHE) by  $\text{Ag}_3\text{PO}_4$  (2 h) in  $^{15}\text{N}_2$  saturated electrolyte solution and (b) photographic representation of cell setup acquired during isotope labelling measurements.

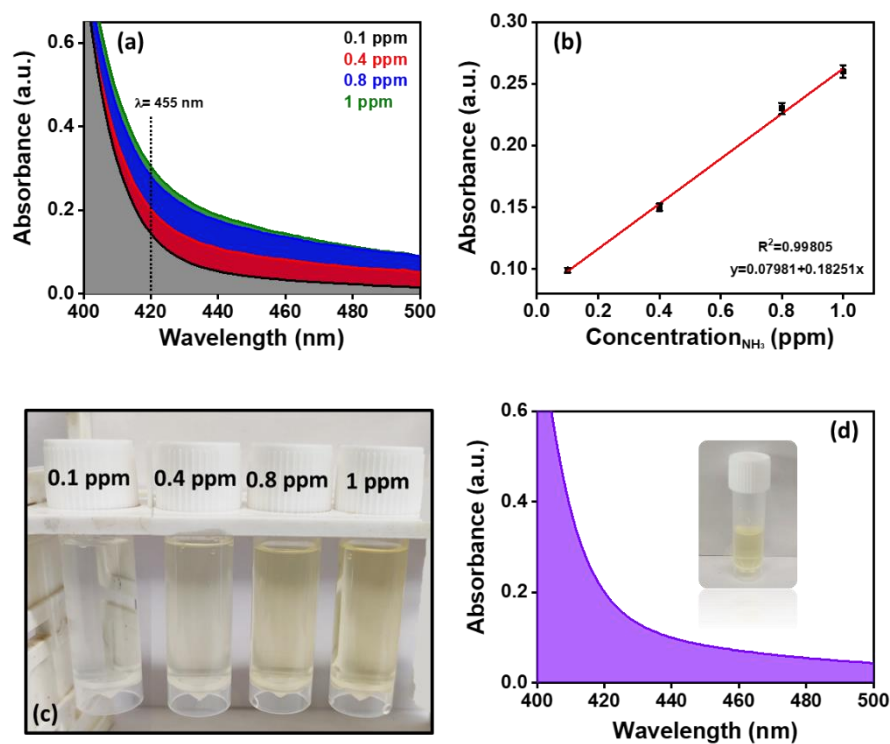

**Fig. S16** (a) UV-Vis. curves acquired for standard  $\text{NH}_4^+$  solutions after Nessler's reagent test and (b) corresponding calibration curve for quantification of  $\text{NH}_3$  in samples. (c) Images showing color development of standard  $\text{NH}_4^+$  solutions after Nessler's test. (d) UV-Vis. curve for electrolyte sample solution collected after 2 h of NRR by  $\text{Ag}_3\text{PO}_4$  (2 h) in  $\text{N}_2$ -saturated 0.1 M KOH.

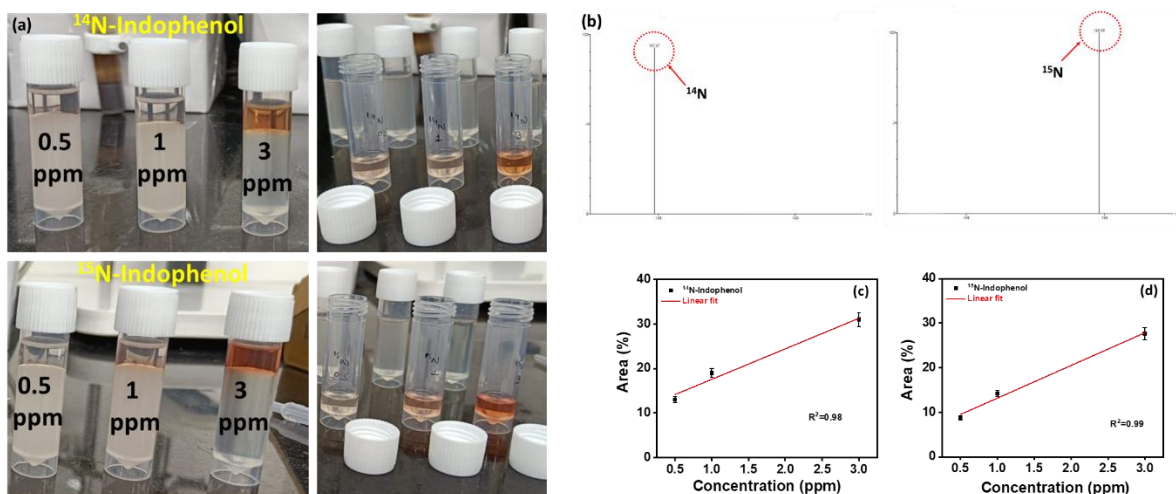

**Fig. S17** (a) Photographs showing the extraction of Indophenol red from organic layer before LC-MS quantification for standard samples, abundance of (b)  $^{14}\text{N}$  Indophenol and  $^{15}\text{N}$  Indophenol for the electrolyte samples obtained after NRR. (c-d) Calibration curves extracted from LC-MS of standard samples after Berthelot reaction.

**Table S6A.** Comparison of  $\text{NH}_3$  yield rates obtained after 2 h of e-NRR by  $\text{Ag}_3\text{PO}_4$  (2 h) at 0 V (vs. RHE).

| S.No. | $\text{NH}_3$ detection method | $\text{NH}_3$ yield rate ( $\mu\text{g h}^{-1} \text{mg}_{\text{cat.}}^{-1}$ ) |
|-------|--------------------------------|--------------------------------------------------------------------------------|
| 1.    | Indophenol Blue                | 456.75                                                                         |
| 2.    | Nessler's reagent              | 435.80                                                                         |

**Table S6B.** Comparison of  $\text{NH}_3$  yield rates obtained after 2 h of e-NRR by  $\text{Ag}_3\text{PO}_4$  (2 h) at 0 V (vs. RHE) by LC-MS (isotope labelling experiment)

| S.No. | Electrolyte sample          | $\text{NH}_3$ yield rate ( $\mu\text{g h}^{-1} \text{mg}_{\text{cat.}}^{-1}$ ) |
|-------|-----------------------------|--------------------------------------------------------------------------------|
| 1.    | $^{14}\text{N}$ -Indophenol | 479.38                                                                         |
| 2.    | $^{15}\text{N}$ -Indophenol | 455.08                                                                         |



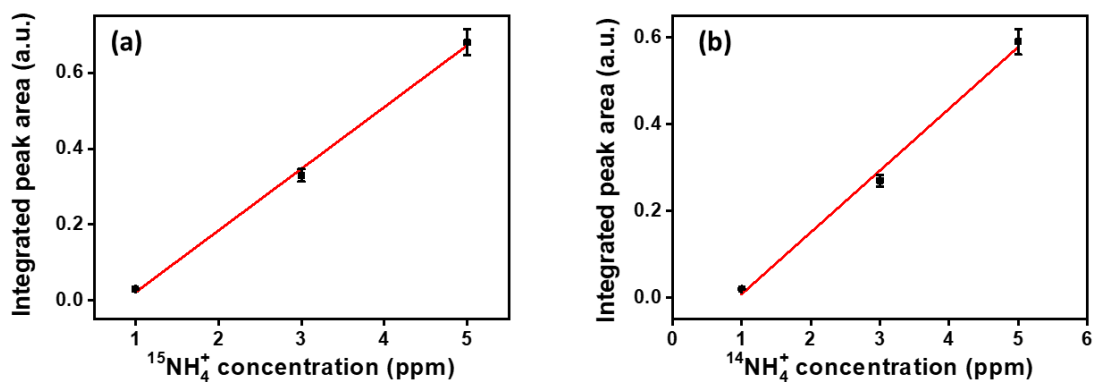

**Fig. S18** (a) Calibration curves for different  $\text{NH}_4^+$  concentration extracted from  $^1\text{H}$  NMR spectra in Fig. 6d for (a)  $^{15}\text{NH}_4^+$  and (b)  $^{14}\text{NH}_4^+$  respectively.

| Table S6C. Comparison of $\text{NH}_3$ yield rates obtained after 2 h of e-NRR by $\text{Ag}_3\text{PO}_4$ (2 h) at 0 V (vs. RHE) by $^1\text{H}$ -NMR (isotope labelling experiment) |                      |                                                                                |
|---------------------------------------------------------------------------------------------------------------------------------------------------------------------------------------|----------------------|--------------------------------------------------------------------------------|
| S.No.                                                                                                                                                                                 | Electrolyte sample   | $\text{NH}_3$ yield rate ( $\mu\text{g h}^{-1} \text{mg}_{\text{cat.}}^{-1}$ ) |
| 1.                                                                                                                                                                                    | $^{14}\text{NH}_4^+$ | 460                                                                            |
| 2.                                                                                                                                                                                    | $^{15}\text{NH}_4^+$ | 410                                                                            |

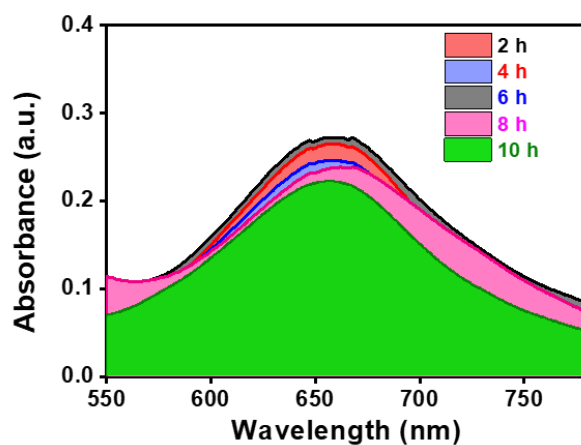

**Fig. S19** UV-vis spectrum for electrolyte sample collected after chronoamperometry for different cycles of 2 hrs by  $\text{Ag}_3\text{PO}_4$  (2 h).

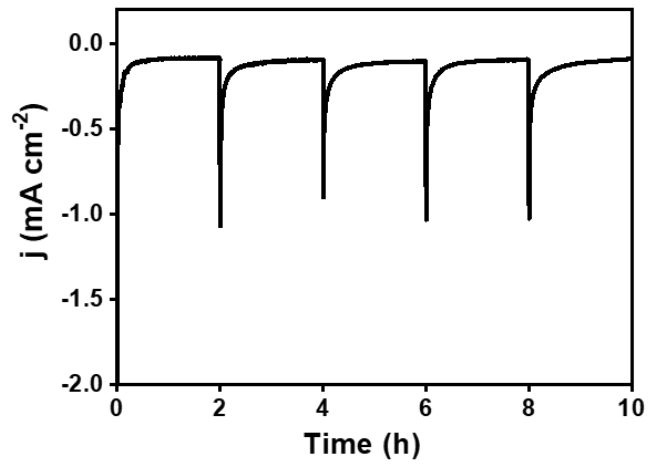

**Fig. S20A** Stability test of  $\text{Ag}_3\text{PO}_4$  (2 h) at 0.0 V vs. RHE for 10 h in  $\text{N}_2$  saturated 0.1 M KOH.

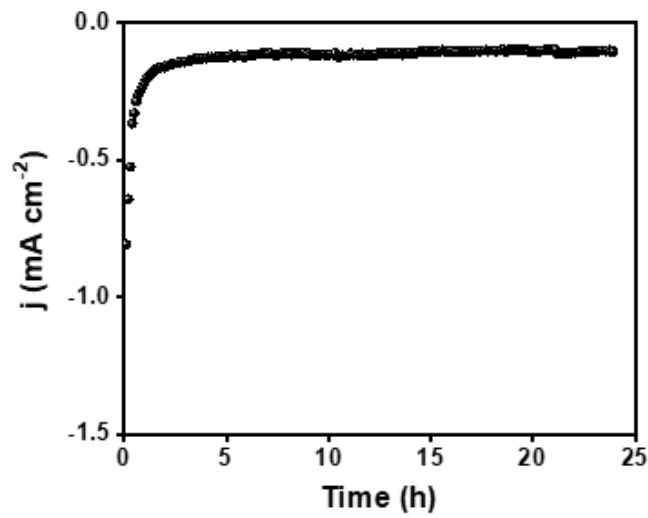

**Fig. S20B** Chronoamperometry curve acquired after 24 h continuous NRR in  $\text{N}_2$ -saturated 0.1 M KOH.

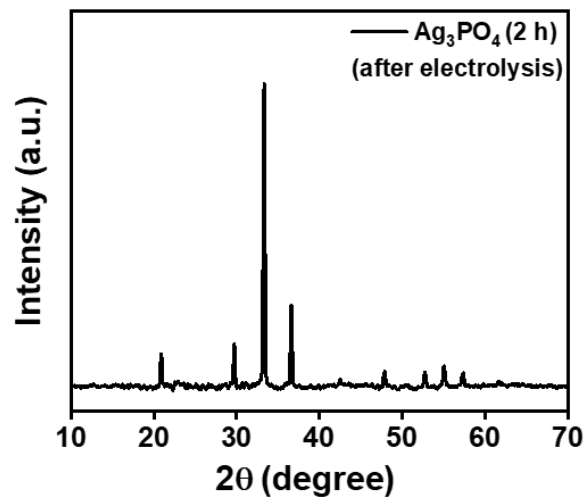

**Fig. S21** Post-stability X-ray diffraction pattern for  $\text{Ag}_3\text{PO}_4$  (2 h) after 10 h electrolysis in 0.1 M KOH electrolyte.

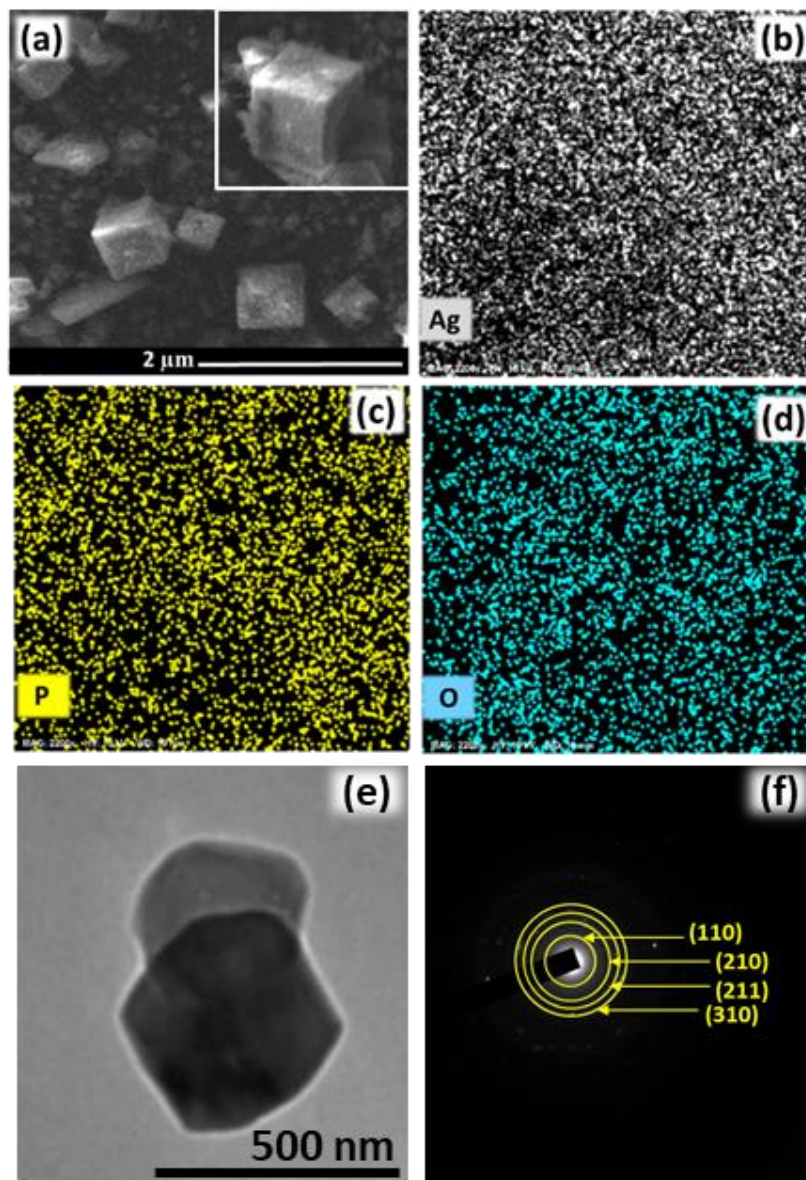

**Fig. S22** (a) SEM image and (b-d) EDX dot mapping for all respective elements in Ag<sub>3</sub>PO<sub>4</sub> (2 h) post-stability measurements. (e) TEM image of Ag<sub>3</sub>PO<sub>4</sub> (2 h) catalyst and (f) corresponding SAED pattern after NRR stability tests.

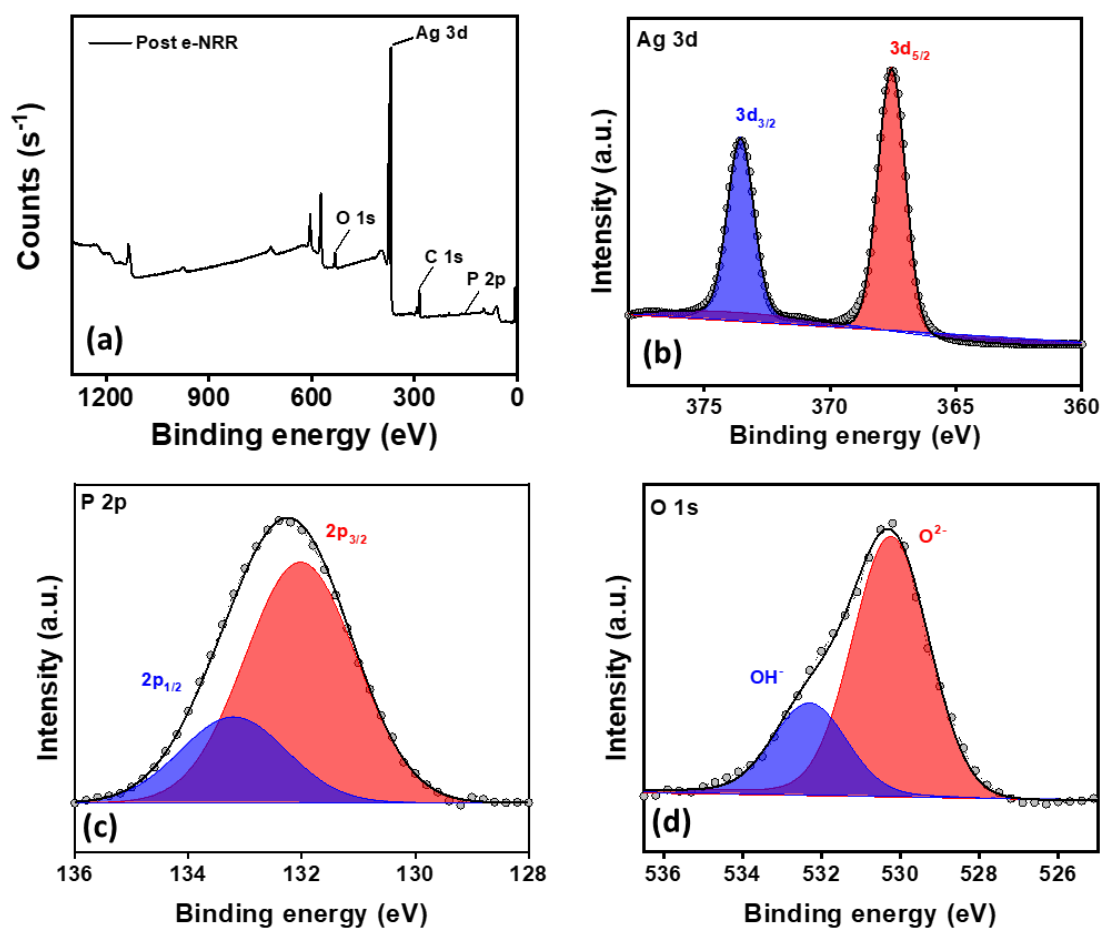

**Fig. S23** Post e-NRR stability (a) survey spectrum and XP deconvoluted (a) Ag 3d, (b) P 2p and (c) O 1s spectra of  $\text{Ag}_3\text{PO}_4$  (2 h).

| Table S7: Post EDS composition analysis of $\text{Ag}_3\text{PO}_4$ (2 h) |         |         |         |         |
|---------------------------------------------------------------------------|---------|---------|---------|---------|
| Before                                                                    |         |         | After   |         |
| Element                                                                   | Weight% | Atomic% | Weight% | Atomic% |
| O K                                                                       | 23.31   | 62.14   | 25.18   | 64.47   |
| P K                                                                       | 7.69    | 10.58   | 7.54    | 9.98    |
| Ag L                                                                      | 69.00   | 27.28   | 67.28   | 25.55   |

## References

1. Y. Zhao, R. Shi, X. Bian, C. Zhou, Y. Zhao, S. Zhang, F. Wu, G. I. Waterhouse, L. Z. Wu and C. H. Tung, *Adv. Sci.*, 2019, **6**, 1802109.
2. H. Cheng, P. Cui, F. Wang, L. X. Ding and H. Wang, *Angew. Chem.*, 2019, **131**, 15687-15693.
3. C. Tang and S.-Z. Qiao, *Joule*, 2019, **3**, 1573-1575.
4. S. Z. Andersen, V. Čolić, S. Yang, J. A. Schwalbe, A. C. Nielander, J. M. McEnaney, K. Enemark Rasmussen, J. G. Baker, A. R. Singh and B. A. Rohr, *Nature*, 2019, **570**, 504-508.
5. S. E. Saji, H. Lu, Z. Lu, A. Carroll and Z. Yin, *Small Methods*, 2021, **5**, 2000694.
6. H. Huang, L. Xia, X. Shi, A. M. Asiri and X. Sun, *Chem. Commun.*, 2018, **54**, 11427-11430.
7. D. Yao, C. Tang, L. Li, B. Xia, A. Vasileff, H. Jin, Y. Zhang and S. Z. Qiao, *Adv. Energy Mater.*, 2020, **10**, 2001289.
8. Y. Li, H. Yu, Z. Wang, S. Liu, Y. Xu, X. Li, L. Wang and H. Wang, *Chem. Commun.*, 2019, **55**, 14745-14748.
9. Y. Tong, H. Guo, D. Liu, X. Yan, P. Su, J. Liang, S. Zhou, J. Liu, G. Q. Lu and S. X. Dou, *Angew. Chem. Int. Ed.*, 2020, **59**, 7356-7361.
10. X.-W. Lv, Y. Liu, Y.-S. Wang, X.-L. Liu and Z.-Y. Yuan, *Appl. Catal. B Environ.*, 2021, **280**, 119434.
11. H. Wang, S. Liu, H. Zhang, S. Yin, Y. Xu, X. Li, Z. Wang and L. Wang, *Nanoscale*, 2020.
12. Hu, Y. Sun, S. Guo, J. Sun, Y. Fu, S. Chen, S. Zhang and J. Zhu, *Appl. Catal. B Environ.*, 2021, **280**, 119419.
13. N. Khaliq, M. A. Rasheed, G. Cha, M. Khan, S. Karim, P. Schmuki and G. Ali, *Sens. Actuators B Chem.*, 2020, **302**, 127200.
14. L. Zhao, R. Zhao, Y. Zhou, X. Wang, X. Chi, Y. Xiong, C. Li, Y. Zhao, H. Wang and Z. Yang, *J. Mater. Chem. A*, 2021, **9**, 24985-24992.
15. L. Ji, X. Shi, A. M. Asiri, B. Zheng and X. Sun, *Inorg. Chem.*, 2018, **57**, 14692-14697.
16. X. Li, Y. Tian, X. Wang, Y. Guo and K. Chu, *Sustain. Energy Fuels*, 2021, **5**, 4277-4283.
17. H. K. Lee, C. S. L. Koh, Y. H. Lee, C. Liu, I. Y. Phang, X. Han, C.-K. Tsung and X. Y. Ling, *Sci. Adv.*, 2018, **4**, eaar3208.
18. W.-Y. Gao, Y.-C. Hao, X. Su, L.-W. Chen, T.-A. Bu, N. Zhang, Z.-L. Yu, Z. Zhu and A.-X. Yin, *Chem. Commun.*, 2019, **55**, 10705-10708.
19. Y. Liu, Y. Luo, Q. Li, J. Wang and K. Chu, *Chem. Commun.*, 2020, **56**, 10227-10230.
20. Y. Chen, R. Guo, X. Peng, X. Wang, X. Liu, J. Ren, J. He, L. Zhuo, J. Sun and Y. Liu, *ACS Nano*, 2020.
21. W. Li, K. Li, Y. Ye, S. Zhang, Y. Liu, G. Wang, C. Liang, H. Zhang and H. Zhao, *Commun. Chem.*, 2021, **4**, 1-11.
22. L. Ma, Z. Bi, Y. Xue, W. Zhang, Q. Huang, L. Zhang and Y. Huang, *J. Mater. Chem. A*, 2020, **8**, 5812-5842.
23. H. Yu, Z. Wang, D. Yang, X. Qian, Y. Xu, X. Li, H. Wang and L. Wang, *J. Mater. Chem. A*, 2019, **7**, 12526-12531.
24. K. Chu, Y.-p. Liu, Y.-b. Li, Y.-l. Guo, Y. Tian and H. Zhang, *Appl. Catal. B Environ.*, 2020, **264**, 118525.
25. T. Wu, H. Zhao, X. Zhu, Z. Xing, Q. Liu, T. Liu, S. Gao, S. Lu, G. Chen and A. M. Asiri, *Adv. Mater.*, 2020, **32**, 2000299.
26. P. Shen, Y. Liu, Q. Li and K. Chu, *Chem. Commun.*, 2020, **56**, 10505-10508.

27. K. Chu, F. Liu, J. Zhu, H. Fu, H. Zhu, Y. Zhu, Y. Zhang, F. Lai and T. Liu, *Adv. Energy Mater.*, 2021, **11**, 2003799.
28. J. Gao, X. Lv, F. Wang, Y. Luo, S. Lu, G. Chen, S. Gao, B. Zhong, X. Guo and X. Sun, *J. Mater. Chem. A*, 2020, **8**, 17956-17959.
29. L. Zhao, J. Zhou, L. Zhang, X. Sun, X. Sun, T. Yan, X. Ren and Q. Wei, *ACS Appl. Mater. Interfaces*, 2020, **12**, 55838-55843.
30. W. Yu, F. Shu, Y. Huang, F. Yang, Q. Meng, Z. Zou, J. Wang, Z. Zeng, G. Zou and S. Deng, *J. Mater. Chem. A*, 2020, **8**, 20677-20686.
31. Y. Fu, K. Li, M. Batmunkh, H. Yu, S. Donne, B. Jia and T. Ma, *ACS Appl. Mater. Interfaces*, 2020, **12**, 44830-44839.
32. Q. Zhang, Y. Shen, Y. Hou, L. Yang, B. Chen, Z. Lei and W. Zhang, *Electrochim. Acta*, 2019, **321**, 134691.
33. W. Li, W. Fang, C. Wu, K. N. Dinh, H. Ren, L. Zhao, C. Liu and Q. Yan, *J. Mater. Chem. A*, 2020, **8**, 3658-3666.
34. T. Chen, S. Liu, H. Ying, Z. Li and J. Hao, *Chem. Asian J.*, 2020, **15**, 1081-1087.
35. Y. Wang, X. Cui, J. Zhao, G. Jia, L. Gu, Q. Zhang, L. Meng, Z. Shi, L. Zheng and C. Wang, *ACS Catal.*, 2018, **9**, 336-344.
36. W. Zang, T. Yang, H. Zou, S. Xi, H. Zhang, X. Liu, Z. Kou, Y. Du, Y. P. Feng and L. Shen, *ACS Catal.*, 2019, **9**, 10166-10173.
37. Y.-X. Lin, S.-N. Zhang, Z.-H. Xue, J.-J. Zhang, H. Su, T.-J. Zhao, G.-Y. Zhai, X.-H. Li, M. Antonietti and J.-S. Chen, *Nat. Commun.*, 2019, **10**, 1-7.
38. M. Wang, S. Liu, T. Qian, J. Liu, J. Zhou, H. Ji, J. Xiong, J. Zhong and C. Yan, *Nat. Commun.*, 2019, **10**, 341.
39. S. Mukherjee, D. A. Cullen, S. Karakalos, K. Liu, H. Zhang, S. Zhao, H. Xu, K. L. More, G. Wang and G. Wu, *Nano Energy*, 2018, **48**, 217-226.
40. L. Han, X. Liu, J. Chen, R. Lin, H. Liu, F. Lü, S. Bak, Z. Liang, S. Zhao and E. Stavitski, *Angew. Chem.*, 2019, **131**, 2343-2347.
41. H. Wang, Y. Li, C. Li, K. Deng, Z. Wang, Y. Xu, X. Li, H. Xue and L. Wang, *J. Mater. Chem. A*, 2019, **7**, 801-805.
42. F. Pang, Z. Wang, K. Zhang, J. He, W. Zhang, C. Guo and Y. Ding, *Nano Energy*, 2019, **58**, 834-841.
43. J. Zhang, X. Li, Y. Liu, Z. Zeng, X. Cheng, Y. Wang, W. Tu and M. Pan, *Nanoscale*, 2018, **10**, 11997-12002.
44. M. M. Shi, D. Bao, S. J. Li, B. R. Wulan, J. M. Yan and Q. Jiang, *Adv. Energy Mater.*, 2018, **8**, 1800124.
45. Y. Yang, L. Zhang, Z. Hu, Y. Zheng, C. Tang, P. Chen, R. Wang, K. Qiu, J. Mao and T. Ling, *Angew. Chem. Int. Ed.*, 2020, **59**, 4525-4531.
46. Y. Zhao, F. Li, W. Li, Y. Li, C. Liu, Z. Zhao, Y. Shan, Y. Ji and L. Sun, *Angew. Chem. Int. Ed.*, 2021, **60**, 20331-20341.
47. S. Liu, M. Wang, T. Qian, H. Ji, J. Liu and C. Yan, *Nat. Commun.*, 2019, **10**, 1-9.
48. Z. Xu, Y. Ying, G. Zhang, K. Li, Y. Liu, N. Fu, X. Guo, F. Yu and H. Huang, *J. Mater. Chem. A*, 2020, **8**, 26130-26138.
49. A. Liu, X. Liang, Q. Yang, X. Ren, M. Gao, Y. Yang and T. Ma, *ChemPlusChem*, 2021, **86**, 166-170.
50. Q. Zhang, C. Zhang, J. Liang, P. Yin and Y. Tian, *ACS Sustain. Chem. Eng.*, 2017, **5**, 3808-3818.
51. A. Liu, Q. Yang, X. Ren, M. Gao, Y. Yang, L. Gao, Y. Li, Y. Zhao, X. Liang and T. Ma, *Sustain. Energy*

*Fuels*, 2020, **4**, 5061-5071.

52. D. Bao, Q. Zhang, F. L. Meng, H. X. Zhong, M. M. Shi, Y. Zhang, J. M. Yan, Q. Jiang and X. B. Zhang, *Adv. Mater.*, 2017, **29**, 1604799.

53. W. Guo, Z. Liang, J. Zhao, B. Zhu, K. Cai, R. Zou and Q. Xu, *Small Methods*, 2018, **2**, 1800204.

54. M. Bat-Erdene, G. Xu, M. Batmunkh, A. S. Bati, J. J. White, M. J. Nine, D. Losic, Y. Chen, Y. Wang and T. Ma, *J. Mater. Chem. A*, 2020, **8**, 4735-4739.

55. H. Jin, L. Li, X. Liu, C. Tang, W. Xu, S. Chen, L. Song, Y. Zheng and S. Z. Qiao, *Adv. Mater.*, 2019, **31**, 1902709.

56. J.-T. Ren, L. Chen, H.-Y. Wang and Z.-Y. Yuan, *ACS Appl. Mater. Interfaces*, 2021, **13**, 12106-12117.

57. D. Wu, H. Wang, H. Huang, R. Zhang, L. Ji, H. Chen, Y. Luo, J. You, D. Tang and Z. Zhang, *Chem. Commun.*, 2019, **55**, 7546-7549.

58. N. Cao, Z. Chen, K. Zang, J. Xu, J. Zhong, J. Luo, X. Xu and G. Zheng, *Nat. Commun.*, 2019, **10**, 1-12.

59. J.-T. Ren, L. Chen, Y. Liu and Z.-Y. Yuan, *J. Mater. Chem. A*, 2021, **9**, 11370-11380.

60. M.-C. Kim, H. Nam, J. Choi, H. S. Kim, H. W. Lee, D. Kim, J. Kong, S. S. Han, S. Y. Lee and H. S. Park, *ACS Catal.*, 2020, **10**, 10577-10584.

61. A. Liu, X. Liang, Q. Yang, X. Ren, M. Gao, Y. Yang and T. Ma, *ChemElectroChem*, 2020, **7**, 4900-4905.

62. L. Li, C. Tang, D. Yao, Y. Zheng and S.-Z. Qiao, *ACS Energy Lett.*, 2019, **4**, 2111-2116.
